# Supplementary material for: Risk Factors Associated With Peripartum Suicide Attempts in Japan
Source: PubMed Central journal article supplement (PMC9857025; doi:10.1001/jamanetworkopen.2022.50661), 2023-01-12
Supplement: jamanetwopen-e2250661-s001.pdf [file jamanetwopen-e2250661-s001.pdf]

## Data Sharing Statement

Akaishi. Risk Factors Associated With Peripartum Suicide Attempts in Japan. *JAMA Netw Open*. Published January 12, 2023. doi:10.1001/jamanetworkopen.2022.50661

### Data

**Data available:** Yes

**Data types:** Deidentified participant data

**How to access data:** The anonymized data that support the findings of this study are available from the corresponding author.

**When available:** With publication

### Supporting Documents

**Document types:** None

### Additional Information

**Who can access the data:** The data will be made available to researchers whose proposed use of the data has been approved.

**Types of analyses:** For research purposes or for reproducing the results.

**Mechanisms of data availability:** After approval of a proposal.

**Any additional restrictions:** Under the protection of the Personal Information Law and the Ethical Guidelines for Medical and Health Research Involving Human Subjects in Japan.
